# Supplementary material for: The generation of compartmentalized nanoparticles containing siRNA and cisplatin using a multi-needle electrohydrodynamic strategy
Source: Royal Society of Chemistry journal article supplement (doi:10.1039/c7nr01002h), 2017-01-01
Supplement: c7nr01002h3.pdf [file c7nr01002h3.pdf]

## Supporting Information

### **The Generation of Compartmentalized Nanoparticles Containing SiRNA and Cisplatin using a Multi-Needle Electrohydrodynamic Strategy**

Maria Pina<sup>a</sup>, Wai Lau<sup>b</sup>, Kathrin Scherer<sup>c</sup>, Maryam Parhizkar<sup>b</sup>,

Mohan Edirisinghe<sup>b</sup>, Duncan Craig<sup>a,\*</sup>

<sup>a</sup> *University College London School of Pharmacy, 29-39 Brunswick Square, London WC1N 1AX, UK*

<sup>b</sup> *Department of Mechanical Engineering, University College London, Torrington Place, London WC1E 7JE, UK*

<sup>c</sup> *MRC Laboratory for Molecular Cell Biology, University College London, Gower Street, London WC1E 6BT, UK*

**Video 1** presents the electrohydrodynamics cone-jet mode during the preparation of dual loaded three-layered particles.

**Video 2** shows a 3D reconstruction of the three-layered cisplatin/siRNA/PLGA obtained using structured illumination microscopy.
